# Supplementary material for: Gene Expression of Abcc2 and Its Regulation by Chicken Xenobiotic Receptor
Source: MDPI journal article supplement (doi:10.3390/toxics12010055), 2024-01-10
Supplement: s1 [file s1]

## **Supplementary Material**

**Article title:** Gene Expression of Abcc2 and Its Regulation by Chicken Xenobiotic Receptor

**Journal name:** Toxics

**Author names:** Yanhong Gao, Huacheng Deng, Yuying Zhao, Mei Li, Liping Wang and Yajuan Zhang

**\*Corresponding author:** Yajuan Zhang (zhangyajuan907@163.com)

Jiangsu Key Laboratory of Sericultural Biology and Biotechnology, School of Biotechnology, Jiangsu University of Science and Technology, Zhenjiang 212100, China.

**Figure S1**

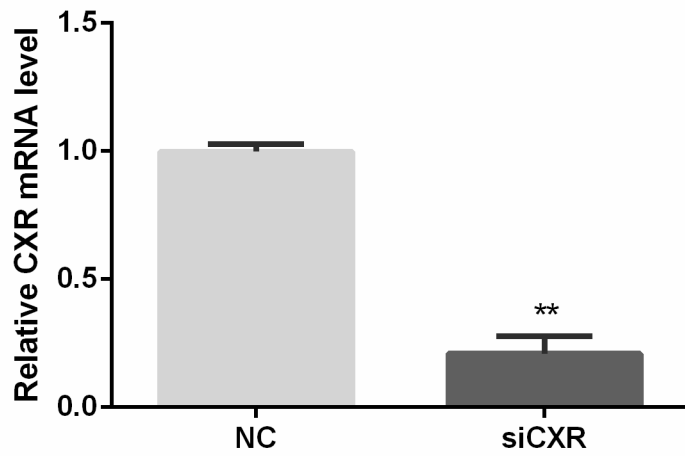

**Figure S1.** Knockdown of CXR. Knockdown of CXR mRNA in chicken primary hepatocytes after 12 h of transfection with negative control (NC)-scrambled siRNA or chicken CXR-specific siRNA (siCXR). Data are represented as mean  $\pm$  SD (N = 4). Bars show means  $\pm$  SD of at least three independent experiments. \*\*  $P < 0.01$ .
